# Supplementary material
Source: PubMed Central journal article supplement (PMC3105648)
Supplement: 2010.031138_2.pdf [file 2010.031138_2.pdf]

**Manuscript no. HAEMATOL/2010/031138 entitled “Classical Hodgkin lymphoma shows epigenetic features of an abortive plasma cellular differentiation”.**

**Authors: Volkhard Seitz, Philippe E. Thomas, Karin Zimmermann, Ulrike Paul, Anke Ehlers, Maria Joosten, Lora Dimitrova, Dido Lenze, Anke Sommerfeld, Elisabeth Oker, Ulf Leser, Harald Stein and Michael Hummel.**

**Information about the contributions of each person named as having participated in the study**

**Guarantor(s)**, i.e., person(s) who is (are) responsible for the integrity of the work as a whole:

- Michael Hummel: Institute of Pathology, Campus Benjamin Franklin, Charité - University Medicine Berlin, Hindenburgdamm 30, Berlin 12200, Germany. E-mail: michael.hummel@charite.de
- Volkhard Seitz: Institute of Pathology, Campus Benjamin Franklin, Charité - University Medicine Berlin, Hindenburgdamm 30, Berlin 12200, Germany. E-mail: volkhard.seitz@charite.de

According to the International Committee of Medical Journal Editors (ICMJE) ([http://www.icmje.org/ethical\\_1author.html](http://www.icmje.org/ethical_1author.html)): “Authorship credit should be based on: 1) substantial contributions to conception and design, acquisition of data, or analysis and interpretation of data; 2) drafting the article or revising it critically for important intellectual content; and 3) final approval of the version to be published. Authors should meet conditions 1, 2, and 3 ..... Acquisition of funding, collection of data, or general supervision of the research group alone does not constitute authorship”.

The guarantors of this manuscript confirm that all persons designated as authors qualify for authorship, and that each author has participated sufficiently in the work to take public responsibility for appropriate portions of the content.

**Authors who participated in the conception of the study:** Volkhard Seitz, Philippe E. Thomas, Karin Zimmermann, Anke Ehlers, Ulf Leser, Harald Stein and Michael Hummel.

**Design & Methods.** The following authors were responsible for specific investigations

- Volkhard Seitz, Ulrike Paul, Anke Ehlers, Maria Joosten, Anke Sommerfeld, Elisabeth Oker were responsible for the *acquisition and analysis of data*.

- Volkhard Seitz, Philippe E. Thomas, Karin Zimmermann, Lora Dimitrova, Dido Lenze, Ulf Leser, Harald Stein and Michael Hummel were responsible for the analysis and interpretation of data.

**Results.** The following authors were responsible for specific portions of the results, including figures and tables

- Volkhard Seitz, Ulrike Paul, Anke Ehlers, Maria Joosten, Lora Dimitrova, Dido Lenze, Anke Sommerfeld, Elisabeth Oker, Ulf Leser, Harald Stein and Michael Hummel were responsible for the ChIP and PCR analyses and the corresponding figures and tables.

- Volkhard Seitz, Philippe E. Thomas, Karin Zimmermann, Ulf Leser and Michael Hummel were responsible for the design and the performance of bioinformatic analyses and the corresponding figures and tables.

**Writing the manuscript.** The following authors were responsible for writing the manuscript: Volkhard Seitz, Philippe E. Thomas, Karin Zimmermann, Maria Joosten, Lora Dimitrova, Dido Lenze, Ulf Leser, and Michael Hummel.

**Contributors Listed in Acknowledgments.** The authors would like to thank H. Lammert, E. Berg and H. Müller for their excellent technical assistance and B. Hirsch and H. Dürkop for stimulating discussion.
